# Supplementary material for: Engineered 3D environments to elucidate the effect of environmental parameters on drug response in cancer
Source: Royal Society of Chemistry journal article supplement (doi:10.1039/c0ib00074d), 2010-11-04
Supplement: c0ib00074d.pdf [file c0ib00074d.pdf]

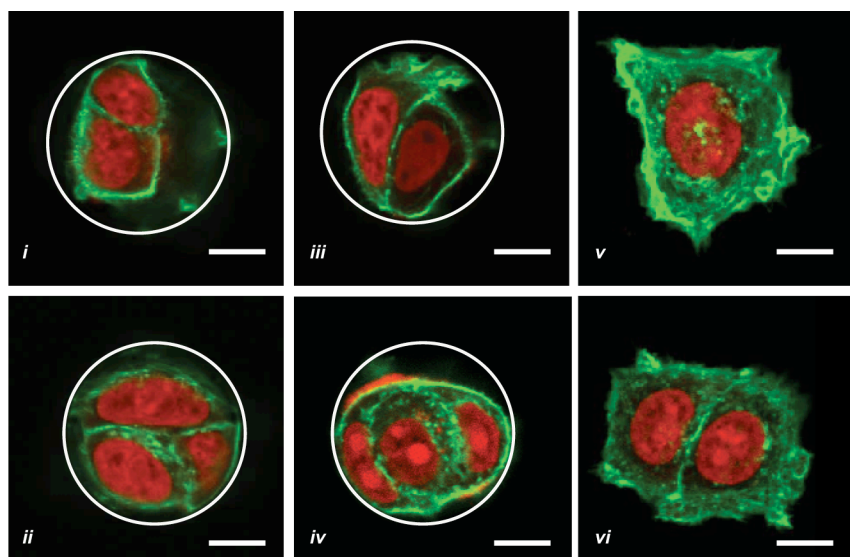

**Supplemental figure** Confocal images of MCF-7 cells cultured for 24 hrs on substrates coated with fibronectin. The four left images (*i-iv*) show cells growing within 34  $\mu\text{m}$  wide microwells. Image two right images (*v* and *vi*) show cells grown on flat PDMS substrates. F-actin (green) and nuclei (red). Scale bar is 10  $\mu\text{m}$ .
